# Supplementary material
Source: publisher site journal article supplement (https://www.dovepress.com/article/347578)
Supplement: Supplementary file 1 [file get_supplementary_file.php]

**Supplementary materials**

**Table S1**. Methodological quality of quantitative studies using the Appraisal Tool for Cross-Sectional Studies (AXIS). Green=described, Yellow=unclear, Red=not described.

| **Quantitative studiesa** | Aims/objective | Design | Sample size | Target population | Sample frame | Selection process | Non-responders | Outcome variables | Measurement | Stat. significance | Description of methods | Description of basic data | Non-response bias | Internal consistency | Description of results | Conclusions justified | Limitations discussed | Conflicts of interest | Ethics |
| --- | --- | --- | --- | --- | --- | --- | --- | --- | --- | --- | --- | --- | --- | --- | --- | --- | --- | --- | --- |
| Fletcher & Martin, 19821 |  |  |  |  |  |  |  |  |  |  |  |  |  |  |  |  |  |  |  |
| Sturesson & Bränholm, 20002 |  |  |  |  |  |  |  |  |  |  |  |  |  |  |  |  |  |  |  |
| Ibáñez et al., 20013 |  |  |  |  |  |  |  |  |  |  |  |  |  |  |  |  |  |  |  |
| Svartberg et al., 20044 |  |  |  |  |  |  |  |  |  |  |  |  |  |  |  |  |  |  |  |
| Köseoglu et al., 20055 |  |  |  |  |  |  |  |  |  |  |  |  |  |  |  |  |  |  |  |
| Karadag et al., 20076 |  |  |  |  |  |  |  |  |  |  |  |  |  |  |  |  |  |  |  |
| Kaptein et al., 20087 |  |  |  |  |  |  |  |  |  |  |  |  |  |  |  |  |  |  |  |
| Collins et al., 20128 |  |  |  |  |  |  |  |  |  |  |  |  |  |  |  |  |  |  |  |
| Uzaslan et al., 20129 |  |  |  |  |  |  |  |  |  |  |  |  |  |  |  |  |  |  |  |
| Kahraman et al., 201310 |  |  |  |  |  |  |  |  |  |  |  |  |  |  |  |  |  |  |  |
| Mulhall et al., 201311 |  |  |  |  |  |  |  |  |  |  |  |  |  |  |  |  |  |  |  |
| Theander et al., 201412 |  |  |  |  |  |  |  |  |  |  |  |  |  |  |  |  |  |  |  |
| Abd-Elsalam et al., 201513 |  |  |  |  |  |  |  |  |  |  |  |  |  |  |  |  |  |  |  |
| Marques et al., 201514 |  |  |  |  |  |  |  |  |  |  |  |  |  |  |  |  |  |  |  |
| Shen et al., 201515 |  |  |  |  |  |  |  |  |  |  |  |  |  |  |  |  |  |  |  |
| Lauretti et al., 201616 |  |  |  |  |  |  |  |  |  |  |  |  |  |  |  |  |  |  |  |
| Turan et al., 201617 |  |  |  |  |  |  |  |  |  |  |  |  |  |  |  |  |  |  |  |
| Dias et al., 201718 |  |  |  |  |  |  |  |  |  |  |  |  |  |  |  |  |  |  |  |
| Hasan et al., 201719 |  |  |  |  |  |  |  |  |  |  |  |  |  |  |  |  |  |  |  |
| Anjum et al., 201820 |  |  |  |  |  |  |  |  |  |  |  |  |  |  |  |  |  |  |  |
| Sinoj et al., 201821 |  |  |  |  |  |  |  |  |  |  |  |  |  |  |  |  |  |  |  |
| Kawshty et al., 201922 |  |  |  |  |  |  |  |  |  |  |  |  |  |  |  |  |  |  |  |
| Oh & Yee, 201923 |  |  |  |  |  |  |  |  |  |  |  |  |  |  |  |  |  |  |  |
| Macêdo et al., 202024 |  |  |  |  |  |  |  |  |  |  |  |  |  |  |  |  |  |  |  |
| Zysman et al., 202025 |  |  |  |  |  |  |  |  |  |  |  |  |  |  |  |  |  |  |  |
| Kamal et al., 202126 |  |  |  |  |  |  |  |  |  |  |  |  |  |  |  |  |  |  |  |

a Hansen et al.27 is not presented, as their abstract without fulltext did not provide sufficiently information for a full quality rating.

**Table S2**. Methodological quality of qualitative studies using the Critical Appraisal Skills Programme (CASP). Green=described, Yellow=unclear, Red=not described.

| **Qualitative studies** | Clear statement of aims | Qualitative methodology appropriate | Research design appropriate | Recruitment strategy appropriate | Data collection appropriate | Researcher-participant relation considered | Ethical issues considered | Data analysis rigorous | Clear statement of findings | Research valuable |
| --- | --- | --- | --- | --- | --- | --- | --- | --- | --- | --- |
| Agle & Baum, 199728 |  |  |  |  |  |  |  |  |  |  |
| O’Neil, 200229 |  |  |  |  |  |  |  |  |  |  |
| Thomsen et al., 200930 |  |  |  |  |  |  |  |  |  |  |
| Panos et al., 201331 |  |  |  |  |  |  |  |  |  |  |

**REFERENCES**

1. Fletcher EC, Martin RJ. Sexual dysfunction and erectile impotence in chronic obstructive pulmonary disease. *Chest* 1982; 81: 413–421.

2. Sturesson M, Branholm I-B. Life satisfaction in subjects with chronic obstructive pulmonary disease. *Work* 2000; 14: 77–82.

3. Ibáñez M, Aguilar JJ, Maderal MA, et al. Sexuality in chronic respiratory failure: Coincidences and divergences between patient and primary caregiver. *Respir Med* 2001; 95: 975–979.

4. Svartberg J, Aasebo U, Hjalmarsen A, et al. Testosterone treatment improves body composition and sexual function in men with COPD, in a 6-month randomized controlled trial. *Respir Med* 2004; 98: 906–913.

5. Köseoǧlu N, Köseoǧlu H, Ceylan E, et al. Erectile dysfunction prevalence and sexual function status in patients with chronic obstructive pulmonary disease. *J Urol* 2005; 174: 249–252.

6. Karadag F, Ozcan H, Karul AB, et al. Correlates of erectile dysfunction in moderate-to-severe chronic obstructive pulmonary disease patients. *Respirology* 2007; 12: 248–253.

7. Kaptein AA, van Klink RCJ, de Kok F, et al. Sexuality in patients with asthma and COPD. *Respir Med* 2008; 102: 198–204.

8. Collins EG, Halabi S, Langston M, et al. Sexual Dysfunction in Men with COPD: Impact on Quality of Life and Survival. *Lung* 2012; 190: 545–556.

9. Uzaslan E, Mahboub B, Beji M, et al. The burden of chronic obstructive pulmonary disease in the Middle East and North Africa: Results of the BREATHE study. *Respir Med* 2012; 106: S45–S59.

10. Kahraman H, Sen B, Koksal N, et al. Erectile dysfunction and sex hormone changes in chronic obstructive pulmonary disease patients. *Multidiscip Respir Med* 2013; 8: 66.

11. Mulhall AM, Lach LA, Krzywkowski-Mohn SM, et al. Therapeutic paralysis in veterans with COPD. *Respir Med* 2013; 107: 1547–1557.

12. Theander K, Hasselgren M, Luhr K, et al. Symptoms and impact of symptoms on function and health in patients with chronic obstructive pulmonary disease and chronic heart failure in primary health care. *Int J Chron Obstruct Pulmon Dis* 2014; 9: 785–794.

13. Abd-Elsalam FG, Mahgoub NA, Ghoneim AH, et al. Chronic Obstructive Pulmonary Disease and sexual functioning among Women in Egypt. *Egypt J Chest Dis Tuberc* 2015; 64: 551–556.

14. Marques A, Jacome C, Cruz J, et al. Family-based psychosocial support and education as part of pulmonary rehabilitation in COPD: a randomized controlled trial. *Chest* 2015; 147: 662–672.

15. Shen TC, Chen WC, Lin CL, et al. The risk of erectile dysfunction in chronic obstructive pulmonary disease. *Medicine (Baltimore)* 2015; 94: e448.

16. Lauretti S, Cardaci V, Barrese F, et al. Chronic obstructive pulmonary disease (COPD) and erectile dysfunction (ED): Results of the BRED observational study. *Arch Ital di Urol Androl organo Uff [di] Soc Ital di Ecogr Urol e Nefrol* 2016; 88: 165–170.

17. Turan O, Ure I, Turan PA. Erectile dysfunction in COPD patients. *Chron Respir Dis* 2016; 13: 5–12.

18. Dias M, Oliveira MJ, Oliveira P, et al. Does any association exist between Chronic Obstructive Pulmonary Disease and Erectile Dysfunction? The DECODED study. *Rev Port Pneumol* 2017; 23: 259–265.

19. Hasan HM, Afify EI, Tawfik TM, et al. Erectile dysfunction in male patients with chronic obstructive pulmonary disease. *Al-Azhar Assiut Med J* 2017; 15: 67–70.

20. Anjum HMA, Akhtar N, Rashid H, et al. Frequency of erectile dysfunction in COPD patients. *J Med Physiol Biophys* 2018; 43: 13–19.

21. Sinoj TM, Manu MK, Alex J, et al. Marital quality and erectile dysfunction among COPD: A cross-sectional study. *J Clin Diagnostic Res* 2018; 12: OC01–OC04.

22. Kawshty H, Makki M., Elmorsy W, et al. Is chronic obstructive pulmonary disease a risk factor for erectile dysfunction? A cross-sectional, comparative study. *Al-Azhar Assiut Med J* 2019; 17: 79–85.

23. Oh EG, Yoo JY. Progression of erectile function in men with chronic obstructive pulmonary disease: A cohort study. *BMC Pulm Med* 2019; 19: 139.

24. Macêdo TE, da Silva G, Morano MT, et al. Sexuality and Associated Factors in Chronic Obstructive Pulmonary Disease (COPD) Patients Attending a Referral Hospital in Northeastern Brazil. *J Sex Marital Ther* 2020; 10.1080/0092623X.2020.1869124.

25. Zysman M, Rubenstein J, Le Guillou F, et al. COPD burden on sexual well-being. *Respir Res* 2020; 21: 1–10.

26. Kamal EE, Zedan HM, Ismail AA, et al. Erectile dysfunction in Egyptian patients with chronic obstructive pulmonary disease. *Egypt J Dermatology Venereol* 2020; 41: 38–44.

27. Hansen MF, Willemoes J, Nielsen SL, et al. Sexual Dysfunction, Depression And Well-Being Among Patients With COPD Or Heart Failure. *Am J Respir Crit Care Med* 2012; 185: A3343.

28. Agle DP, Baum GL. Psychological aspects of chronic obstructive pulmonary disease. *Med Clin North Am* 1977; 61: 749–758.

29. O’Neill ES. Illness representations and coping of women with chronic obstructive pulmonary disease: A pilot study. *Hear Lung J Acute Crit Care* 2002; 31: 295–302.

30. Thomsen D, Jensen BO. Patients’ experiences of everyday life after lung transplantation. *J Clin Nurs* 2009; 18: 3472–3479.

31. Panos RJ, Krywkowski-Mohn SM, Sherman SN, et al. Patient reported determinants of health: A qualitative analysis of veterans with chronic obstructive pulmonary disease. *COPD J Chronic Obstr Pulm Dis* 2013; 10: 333–347.
